# Supplementary material
Source: publisher figshare collection journal article supplement (https://gsajournals.figshare.com/ndownloader/files/31271185)
Supplement: Supplementary file 1 [file 31271185]

## Sheet: Sheet1
	Supplementary Table S3. Primers and sequences
	Note, primers are organized by figure and assay, so some primers appear more than once.
	S3A. RMCE plasmid integration validation
	Integrations can be 2 orientations. We arbitrarily decided to use the direction of the inserted Cb-unc-119(+) gene to denote the orientation of the inserted transgene.
	Orientation 1: Cb-unc-119(+) direction 5' to 3' corresponds to increasing LG II genetic map position, or left to right along LG II sequence.
	Orientation 2: Cb-unc-119(+) direction 5' to 3' corresponds to decreasing LG II genetic map position, or right to left along LG II sequence.
	Primer name	Sequence (5'-3')	Purpose	Primer in Fig. 1D (diamonds)	PCR assay in Fig. 1D
	1.7kb_recombination_F	TCT GGC TCT GCT TCT TCG TT	Left junction; orientation 1 of pBRC_double_attB_GFP_donor	Orange 'a'	Orange 1
	GFPfusionREV_primer	CTC CAC TGA CAG AAA ATT TG		Orange 'b'
	Cm F	GCC GGA TAA AAC TTG TGC TT	Right junction; orientation 1 of pBRC_double_attB_GFP_donor	Orange 'c'	Orange 2
	NM3884	ATC GGG AGG CGA ACC TAA CTG		Orange 'd'
	1.7kb_recombination_F	TCT GGC TCT GCT TCT TCG TT	Left junction; orientation 2 of pBRC_double_attB_GFP_donor	Orange 'a'	Not shown
	Cm F	GCC GGA TAA AAC TTG TGC TT		Orange 'c'
	GFPfusionREV_primer	CTC CAC TGA CAG AAA ATT TG	Right junction; orientation 2 of pBRC_double_attB_GFP_donor	Orange 'b'	Not shown
	NM3884	ATC GGG AGG CGA ACC TAA CTG		Orange 'd'
	1.7kb_recombination_F	TCT GGC TCT GCT TCT TCG TT	Left junction; orientation 2 of pBRC_double_attB_GFP_mCherry	Orange 'a'	Orange 4
	mcherry_F	AGT TTT GCG GTT TGT GTT CC		Orange 'e'
	GFPfusionREV_primer	CTC CAC TGA CAG AAA ATT TG	Right junction; orientation 2 of pBRC_double_attB_GFP_mCherry	Orange 'b'	Orange 5
	NM3884	ATC GGG AGG CGA ACC TAA CTG		Orange 'd'
	1.7kb_recombination_F	TCT GGC TCT GCT TCT TCG TT	Left junction; orientation 1 of pBRC_double_attB_GFP_mCherry	Orange 'a'	Not shown
	GFPfusionREV_primer	CTC CAC TGA CAG AAA ATT TG		Orange 'b'
	mcherry_F	AGT TTT GCG GTT TGT GTT CC	Right junction; orientation 1 of pBRC_double_attB_GFP_mCherry	Orange 'e'	Not shown
	NM3884	ATC GGG AGG CGA ACC TAA CTG		Orange 'd'
	1.7kb_recombination_F	TCT GGC TCT GCT TCT TCG TT	Flanking (long range) pBRC_double_attB_GFP_donor	Blue 'a'	Blue 3
	NM3884	ATC GGG AGG CGA ACC TAA CTG		Blue 'd'
	NM3887	ACC GGA AAC CAA AGG ACG AGA G	Flanking (long range) pBRC_double_attB_GFP_mCherry	Blue 'f'	Blue 6
	NM3888	ACG CCC AGG AGA ACA CGT TAG		Blue 'g'
	phiC31_43.1_seq_F	GGT ATG GCA AAA AGT GCG ATG CAA GGA TAC T	phiC31 presence	Not shown	Not shown
	phiC31_43.1_seq_R	CCT ATT ATG GAA GTA ATG TTT CTA A
	S3B. Southern validation of short BAC (attB_retrofitted_Sinv47D10_short)
	Primer name	Sequence (5'-3')	Purpose	Primer in Fig. 3A and B	Fig. 3A and B
	probe_2 forward	GACAGAGCATAAAGCGCGTG	Probe for Southern analysis	Not shown	Blue circle with #2 and bar
	probe_2 reverse	CTCGAGAGGGCGAAACGATA
	S3C1. Chromosomal inversion experiment primers
	Primer name	Sequence (5'-3')	Purpose	Primer in Fig. 4A & B	PCR assay in Fig. 4
	dpy-10 decoy sequence	CACTTGAACTTCAATACGGCAAGATGAGAATGACTGGAAACCGTACCGCATGCGGTGCCTATGGTAGCGGAGCTTCACATGGCTTCAGACCAACAGCCTAT	Single stranded repair sequence for co-CRISPR at dpy-10	Not shown, used for co-CRISPR
	Dpy-10_sgRNA_Q5_F	aggcaccacgagGTTTTAGAGCTAGAAATAGCAAG	Q5 mutagenesis of plasmid PU6::unc-119_sgRNA (Friedland et al 2013; Addgene plasmid #46169) to obtain a plasmid containing the dpy-10 sgRNA construct (T7+dpy-10+scaffold_clone_4); lowercase, for dpy-10; UPPERCASE, common sequence	NA
	Dpy-10_sgRNA_Q5_R	atggtagcaagaAAACATTTAGATTTGCAATTCAATTATATAG
	T7+dpy-10 crRNA (F)	TAA TAC GAC TCA CTA TAG GCT ACC ATA GGC ACC ACG AG	PCR of dpy-10 sgRNA for in vitro T7 transcription; paired with primer Scaffold (R); bold, T7 promoter; underlined, dpy-10 target sequence	NA
	dpy-13_attP_F	AGG AAA CGA CGG AAC CCC AGG TAA TCA TTT CAT AGT TTT TCA ATC AAT ATG TAC TGA CGG ACA CAC CGA AGC CCC	PCR to generate attP repair template to insert into dpy-13; template was pBCPB+ from Groth et al 2000 (Addgene plasmid #18940)	Not shown
	dpy-13_attP_R	GTC CTG GTG GTC CCT TTG GTC CAG GTT GTC CTG AAA GAT GTG GTG ATT AGT CGC GCT CGC GCG ACT GAC GGT CGT		Not shown
	Dpy-13_sgRNA_Q5_F_1	gattagatatggGTTTTAGAGCTAGAAATAGCAAG	Q5 mutagenesis of plasmid PU6::unc-119_sgRNA (Friedland et al 2013; Addgene plasmid #46169) to obtain a plasmid containing the dpy-13 sgRNA construct (T7+dpy-13+scaffold_clone_1); lowercase, for dpy-13; UPPERCASE, common sequence	NA
	Dpy-13_sgRNA_Q5_R_1	accacatctttcAAACATTTAGATTTGCAATTCAATTATATAG
	T7+dpy-13 crRNA (F)	TAA TAC GAC TCA CTA TAG G AA AGA TGT GGT GAT TAG ATA	PCR of dpy-13 sgRNA for in vitro T7 transcription; paired with primer Scaffold (R); bold, T7 promoter; underlined, dpy-13 target sequence	NA
	New_T7+unc-30_sgRNA	TAA TAC GAC TCA CTA TAG G TG TCA ATT ACC GTA TTG CGG GTTTTAGAGCTAGAA	PCR of unc-30 sgRNA for in vitro T7 transcription; paired with primer Scaffold (R); bold, T7 promoter; underlined, unc-30 target sequence; italics, partial scaffold	NA
	unc-30+attB_SSODN_antisense	ataatattacaaaaagttgagacaagcggagtacccccgcttccaGGGTGCCAGGGCGTGCCCTTGGGCTCCCCGGGCGCGTAattgtttatgacataagaggcaagatgatgtctggcaagaagggg	Single strand oligo repair template for insertion of attB into unc-30; UPPERCASE, attB; we succeeded with this oligo	Not shown
	unc-30+attB_SSODN_sense	ccccttcttgccagacatcatcttgcctcttatgtcataaacaatTACGCGCCCGGGGAGCCCAAGGGCACGCCCTGGCACCCtggaagcgggggtactccgcttgtctcaactttttgtaatattat	Single strand oligo repair template for insertion of attB into unc-30; UPPERCASE, attB; we were unsuccessful with this oligo	Not shown
	Scaffold (R)	AAA AAA AGC ACC GAC TCG GTG C	Reverse primer for PCR of gene specific sgRNAs for in vitro T7 transcription	NA
	dpy-13_F	GGA TCC ATG AAG GAC GTC TG	Confirm attP insertion; test for wt orientation	Green F	Panel A top left
	dpy-13_R	GAG CAA CGC ATA AGG CAA AG		Green R
	v2_new_unc-30+attB_check_F	CAA TTG TTT ATA CCA CAC GAG AAT G	Confirm attB insertion; test for wt orientation	Red F	Panel A top right
	v2_new_unc-30+attB_check_R	CTA GTT ATC TGT ACC CCG AGT TTC C		Red R
	dpy-13_F	GGA TCC ATG AAG GAC GTC TG	Test for attL; test for inversion	Green F	Panel A bottom left
	v2_new_unc-30+attB_check_F	CAA TTG TTT ATA CCA CAC GAG AAT G		Red F
	dpy-13_R	GAG CAA CGC ATA AGG CAA AG	Test for attR; test for inversion	Green R	Panel A bottom right
	v2_new_unc-30+attB_check_R	CTA GTT ATC TGT ACC CCG AGT TTC C		Red R
	NA, not applicable
	Ref: Friedland et al 2013 Nat Methods 10(8):741-743
	Ref: Groth et al 2000 PNAS 97(11):5995-6000
	S3C2. Chromosomal inversion experiment associated sequences
	Sequence name	Sequence (5'-3')	Description
	targeting sequence for dpy-10	gctaccataggcaccacgag	Targeting sequence for dpy-10 in sgRNA
	dpy-10_T7+sgRNA+scaffold	TAA TAC GAC TCA CTA TAG GCT ACC ATA GGC ACC ACG AG GTTTTAGAGCTAGAAATAGCAAGTTAAAATAAGGCTAGTCCGTTATCAACTTGAAAAAGTGGCACCGAGTCGGTGCTTTTTTT	PCR product for in vitro T7 transcription of dpy-10 sgRNA; bold, T7 promoter; underlined, dpy-10 target sequence; italics, scaffold
	targeting sequence for dpy-13	AA AGA TGT GGT GAT TAG ATA	Targeting sequence for dpy-13 in sgRNA
	dpy-13_T7+sgRNA+scaffold	TAA TAC GAC TCA CTA TAG G AA AGA TGT GGT GAT TAG ATA GTTTTAGAGCTAGAAATAGCAAGTTAAAATAAGGCTAGTCCGTTATCAACTTGAAAAAGTGGCACCGAGTCGGTGCTTTTTTT	PCR product for in vitro T7 transcription of dpy-13 sgRNA; bold, T7 promoter; underlined, dpy-13 target sequence; italics, scaffold
	attP repair sequence for dpy-13	AGGAAACGACGGAACCCCAGgtaatcatttcatagtttttcaatcaatat gtactgacggacacaccgaagccccggcggcaaccctcagcggatgccccggggcttcacgttttcccaggtcagaagcggttttcgggagtagtg ccccaactggggtaacctttgagttctctcagttggggg cgtagggtcgccgacatgacacaaggggttgtgaccggggtggacacgtacgcgggtgcttacgaccgtcagtcgcgcgagcgcga ctaatcaccacatctttcagGACAACCTGGACCAAAGGGACCACCAGGAC	PCR product used as repair fragment to introduce an attP site into intron 2 of dpy-13. A 221 bp attP region is between the homology region (red; UPPERCASE, exonic sequence; lowercase, intronic sequence); a 39 bp minimal attP site is marked in bold blue (see Groth et al 2000)
	targeting sequence for unc-30	TG TCA ATT ACC GTA TTG CGG	Targeting sequence for unc-30 in sgRNA
	unc-30_T7+GG+sgRNA+scaffold	TAA TAC GAC TCA CTA TAG G TG TCA ATT ACC GTA TTG CGG GTTTTAGAGCTAGAAATAGCAAGTTAAAATAAGGCTAGTCCGTTATCAACTTGAAAAAGTGGCACCGAGTCGGTGCTTTTTTT	PCR product for in vitro T7 transcription of unc-30 sgRNA; bold, T7 promoter; underlined, unc-30 target sequence; italics, scaffold
	Ref: Groth et al 2000 PNAS 97(11):5995-6000
	S3D. Construction of pCG150_double_phiC31_attB plasmid
	Primer name	Sequence (5'-3')	Description	Primer in Sup. Fig. S1
	attB-phiC31_f_SbfI_PciI_top	CATGGGTGCCAGGGCGTGCCCTTGGGCTCCCCGGGCGCGTACCTGCAGG	phiC31 attB site underlined; SbfI site in bold	Primer pair in middle-left of figure
	attB-phiC31_f_SbfI_PciI_bottom	CATGCCTGCAGGTACGCGCCCGGGGAGCCCAAGGGCACGCCCTGGCACC
	attB-phiC31_r_SacII/I_top	TACGCGCCCGGGGAGCCCAAGGGCACGCCCTGGCACCCAGCT	phiC31 attB site underlined	Primer pair in middle-right of figure
	attB-phiC31_r_SacII/I_bottom	GGGTGCCAGGGCGTGCCCTTGGGCTCCCCGGGCGCGTAGC
	S3E. Operon reporter construction
	Primer name	Sequence (5'-3')	Description	Primer number in Sup. Fig. S2
	SCM_PmlI_Fwd	CTTATGTAGCTCTTCACGTGATTCTTCAATACGC	PmlI site, underlined.	1
	GFP(PEST)_MreI_IVS_Rev	CCGCCACCGCCGGCGGGAAGCCATGGCTAAGTCTAGACATACCGGTACCCTCAAGGGTCC	MreI site, underlined. GFP start codon, bold.	2
	NheI_GFP_Fwd	GAGGCTAGCAAGTTTGTACAAAAAAGCAGGCTCCATGTCTAG	NheI site, underlined. GFP start codon, bold. This NheI site was used to clone GFP(PEST)::H2B to a midway plasmid.	3
	H2B_Stop_Rev	TTACTTGCTGGAAGTGTACTTGGTG	H2B stop codon, bold.	4
	H2B_lin-41 3′UTR_Fwd	CACCAAGTACACTTCCAGCAAGTAAACACTTTCTTCTTGCTCTTTACCC	H2B stop codon, bold.	5
	lin-41 3′UTR _SL2_Rev	TGAATAAATATACAACCTTTATTCCAATTATGTTATCAGCAATATATTTC	lin-41 poly(A) signal, bold.	6
	SL2_Fwd	AATAAAGGTTGTATATTTATTCATCTTATTGAATCTG	gpd-2 poly(A) signal, bold.	7
	SL2_XhoI_Rev	CTCCTCTCCCTTGGAGACCATCTCGAGCATGATGCGTTGAAGCAGTTTC	XhoI site, underlined. mCherry start codon, bold. This XhoI site was added for relevant cloning and enzyme digestion check.	8
	SL2_XhoI_mCherry_Fwd	GAAACTGCTTCAACGCATCATGCTCGAGATGGTCTCCAAGGGAGAGGAG	XhoI site, underlined. mCherry start codon, bold.	9
	H2B_Unc-54 3′UTR _Fwd	CACCAAGTACACTTCCAGCAAGTAAGTCCAATTACTCTTCAACATCCC	H2B stop codon, bold.	10
	AmpR_PvuI_Rev	GTTAGCTCCTTCGGTCCTCCGATCG		11
	Pdpy-30_GW_Fwd	GGGGACAACTTTGTATAGAAAAGTTGAGACATATACCGAACAATTTTAAATGTAAGGTAT	Gateway attB4 site, underlined.	12
	Pdpy-30_GW_Rev	GGGGACTGCTTTTTTGTACAAACTTGTCATCTTGGTTTTTGCTCGATTTCTGAAACAAG	Gateway attB1r site, underlined.	13
	SbfI_Pdpy-30_Fwd	CAAGCTTGCATGCCTGCAGGAGACATATACCGAACAATTTTAAATGTAAGGTATCGACAGTTTGATC	SbfI site, underlined.	14
	PEST_XbaI_Pdpy-30_Rev	GCCATGGCTAAGTCTAGACATCTTGGTTTTTGCTCGATTTCTGAAACAAG	XbaI site, underlined. GFP start codon, bold.	15
	ATG_XbaI_PEST_Fwd	ATGTCTAGACTTAGCCATGGC	XbaI site, underlined. GFP start codon, bold.	16
	NotI_H2B_Rev	GGTGGACTAGTTCTGGAGCGGCC	Part of NotI site, underlined.	17
	S3F1. SCM promoter operon validation: left anchored
	Primer name	Sequence (5'-3')	Location	Primer number and arrow color (if not black) in Sup. Fig. S3A & B
	Extended EG4322F	GGCACATGCTTCGTGCAAAACAGGATCCAAATGAATATC	left of ttTi5605	12 (green)
	1.5K_R	GTTTGGCAATCCGTAGACCTCAGTT	SCM promoter	1
	3K_R	ATTGTAAACTACGCATACCTTTTCA	SCM promoter	2
	4.5K_R	ATGTTGGACTCAATCTGCTCAGAGA	SCM promoter	3
	6K_R	GAGAACGAGGGACTGTAATTCGTGT	SCM promoter	4
	7.5K_R	GCCCGAGCCCTGTCCTAATTTATGT	SCM promoter	5
	9K_R	TAAACTTACGTGTCTTGTAGTTCCCGTC	GFP exon 2 to intron	6
	10.5K_R	TCGCGTTGAGTGTAGAACGGTTGTATA	LSC1*	7
	12K_R	TACCTGATCCCTTGTAAAGCTCATCC	mCherry exon 4 to H2B	8
	13.5K_R	GTGTCAAAAACTTTCGGCAATTACCGTTT	unc-119 promoter	9
	15K_R	GATCATGTCGTCCATGAGTTGTTGTGA	unc-119 exons 3 and 4	10
	Extended EG4322R	AGGAGAACACGTTAGTTTTCTTGTTTTTGATTGCGTGCGTTA	right of ttTi5605	11 (red)
	S3F2. SCM promoter operon validation: right anchored
	Primer name	Sequence (5'-3')	Location	Primer number and arrow color (if not black) in Sup. Fig. S3A & B
	Extended EG4322R	AGGAGAACACGTTAGTTTTCTTGTTTTTGATTGCGTGCGTTA	right of ttTi5605 (same as above)	11 (red)
	1.5k_r	AAGCTACAACAGCATATATGAAGGCAGAGCAACA	unc-119 promoter to exon 1	22
	3k_r	CCCTCGAGGTCGACGGTATCGATAAG	between unc-54 3' UTR and unc-119 promoter	21
	4.5k_r	GGAGAGGAGGATAACATGGCTATCATCAAGGAGT	mCherry exon 1	20
	6k_r	ATCCCAACGAAAAGAGAGACCACATGGTC	GFP exon 4	19
	7.5k_r	ATTGGCCAAAGGACCCAAAGGTATGTTTC	IVSA of gfp	18
	9k_r	TATGTTCACTTCTCATGTCAACGCCAAGGAGT	SCM promoter	17
	10.5k_r	CACTGATAAAATATCAACCCGGTTATCTTTTTGCATAGCA	SCM promoter	16
	3K_ver2	ACAATGGATAATTTGGGTGTGGAGAAGT	SCM promoter	15
	13.5k_r	TTGTGACTACTTGAGAGGTCCGGCAACT	SCM promoter	14
	attB-phiC31_f_SbfI_PciI_F	CATGGGTGCCAGGGCGTGCCCTTGGGCTCCCCGGGCGCGTACCTGCAGG	before the promoter	13
	Extended EG4322F	GGCACATGCTTCGTGCAAAACAGGATCCAAATGAATATC	left of ttTi5605 (same as above)	12 (green)
	S3G1. dpy-30 promoter operon validation: left anchored
	Primer name	Sequence (5'-3')	Location	Primer number and arrow color (if not black) in Sup. Fig. S3C & D
	Extended EG4322F	GGCACATGCTTCGTGCAAAACAGGATCCAAATGAATATC	left of ttTi5605 (same as above)	8 (green)
	dpy 1.5k	TTGGAGCTGTCTCGAATATTCGAATCCCTAC	dpy-30 promoter	1
	dpy 3k	AACTTACCCATGGAACAGGTAGTTTTCCAG	GFP exon 1 to intron	2
	lin-41_3UTR_PacI_Reverse	CAAATACTATATGAAATACATAACTCTTAATTAACCTGTGTAG	lin-41 3' UTR*	3
	mCherry exon2-genotyping-F	GTGCTTGACGTAAGCCTTGGATCCGTACATGAAC	mCherry exon 2	4
	13.5K_R	GTGTCAAAAACTTTCGGCAATTACCGTTT	unc-119 promoter	5
	dpy 9k	AGCATAGGAATCCTTGAGTGATTCCTGGA	unc-119 exons 2 and 3	6
	Extended EG4322R	AGGAGAACACGTTAGTTTTCTTGTTTTTGATTGCGTGCGTTA	right of ttTi5605 (same as above)	7 (red)
	S3G2. dpy-30 promoter operon validation: right anchored
	Primer name	Sequence (5'-3')	Location	Primer number and arrow color (if not black) in Sup. Fig. S3C & D
	Extended EG4322R	AGGAGAACACGTTAGTTTTCTTGTTTTTGATTGCGTGCGTTA	right of ttTi5605 (same as above)	7 (red)
	1.5k_r	AAGCTACAACAGCATATATGAAGGCAGAGCAACA	unc-119 promoter to exon 1	14
	3k_r	CCCTCGAGGTCGACGGTATCGATAAG	between unc-54 3' UTR and unc-119 promoter	13
	4.5k_r	GGAGAGGAGGATAACATGGCTATCATCAAGGAGT	mCherry exon 1	12
	6k_r	ATCCCAACGAAAAGAGAGACCACATGGTC	GFP exon 4	11
	pdpy F4	CCCAGTGCACTTTTCGAGTGGC	dpy-30 promoter	10
	dpy-30-2kbp-seq_F	CTCCAATTACCAACGAACAAG	dpy-30 promoter	9
	Extended EG4322F	GGCACATGCTTCGTGCAAAACAGGATCCAAATGAATATC	left of ttTi5605 (same as above)	8 (green)
	S3H. phiC31 expression validation
	Primer name	Sequence (5'-3')	Purpose	Sup. Fig. S4
	Phic31_22334F	CCC AGG ATC TAT CAC CGG AC	Confirm splicing removal of introns 2 and 3 in phiC31	Red arrows above exons 2 and 4
	Phic31_22334R	GGG TCT CCT CGT CTC CCT
	S3I. Validation of sur-5p::GFP insertion into antIs30
	Orientation 1: sur-5p::GFP direction 5' to 3' corresponds to increasing LG II genetic map position, or left to right along LG II sequence.
	Orientation 2: sur-5p::GFP direction 5' to 3' corresponds to decreasing LG II genetic map position, or right to left along LG II sequence.
	Primer name	Sequence (5'-3')	Purpose	Sup. Fig. S5
	phiC31_43.1_seq_F	GGT ATG GCA AAA AGT GCG ATG CAA GGA TAC T	phiC31 presence	Orange 1
	phiC31_43.1_seq_R	CCT ATT ATG GAA GTA ATG TTT CTA A
	1.7kb_recombination_F	TCT GGC TCT GCT TCT TCG TT	Orientation 1, left	Green 2
	GFP_F_primer	GGT CCT TCT TGA GTT TGT AAC
	GFPfusionREV_primer	CTC CAC TGA CAG AAA ATT TG	Orientation 1, right	Green 3
	NM3884	ATC GGG AGG CGA ACC TAA CTG
	1.7kb_recombination_F	TCT GGC TCT GCT TCT TCG TT	Orientation 2, left	Rightward pointing arrows from green 2 and 3 (note, this orientation is not shown in the figure)
	GFPfusionREV_primer	CTC CAC TGA CAG AAA ATT TG
	GFP_F_primer	GGT CCT TCT TGA GTT TGT AAC	Orientation 2, right	Leftward pointing arrows from green 2 and 3 (note, this orientation is not shown in the figure)
	NM3884	ATC GGG AGG CGA ACC TAA CTG
	NM3887	ACC GGA AAC CAA AGG ACG AGA G	Full flanking PCR	Blue 4
	NM3888	ACG CCC AGG AGA ACA CGT TAG
	S3J. 33.4 kb BAC integration validation (attB_retrofitted_Sinv47D10_short)
	Primer name	Sequence (5'-3')	Purpose	Primer in Sup. Fig. S6 (diamonds)	PCR assay in Sup. Fig. S6
	NM3887	ACC GGA AAC CAA AGG ACG AGA G	Orientation 1, left	Orange 'a'	Orange 1
	unc-119_R	TTG TTG AGA GAG TTG AGG GAA C		Orange 'b'
	NM3888	ACG CCC AGG AGA ACA CGT TAG	Orientation 1, right	Orange 'c'	Orange 2
	mark03_sp6seq_F	ACT ACT TAT ATT TGC GAT AGC CAT G		Orange 'd'
	NM3887	ACC GGA AAC CAA AGG ACG AGA G	Orientation 2, left	Orange 'a'	Not shown
	SP6_R	CTA CTT ATA TTT GCG ATA GCC ATG		Not shown (overlaps orange 'd')
	NM3888	ACG CCC AGG AGA ACA CGT TAG	Orientation 2, right	Orange 'c'	Not shown
	unc-119_promoter_500_R	CAG AAA TGG GAA AAA GAG GAA G		Not shown (similar to orange 'b')
	phiC31_43.1_seq_F	GGT ATG GCA AAA AGT GCG ATG CAA GGA TAC T	phiC31 presence	Not shown	Not shown
	phiC31_43.1_seq_R	CCT ATT ATG GAA GTA ATG TTT CTA A		Not shown
	mark03_F_1	AAG CCC GTT TTC ATA ATA TAT GGT T	BAC seq near 1 kb	Blue 'i'	Blue 1
	mark03_R_1	TCT CTG AAT TTT CTT ATC GTG GAA C		Blue 'j'
	mark03_5kb_F	ATA TTG TAA CTA AAA GCG AGG AGC A	BAC seq near 5 kb	Blue 'k'	Blue 2
	mark03_5kB_R	TTA CGT TGC ATC GTT AAT GAT AAT G		Blue 'l'
	mark03_10kb_F	ATA AAC TAG AAA ACA AAA CGC ATC G	BAC seq near 10 kb	Blue 'm'	Blue 3
	mark03_10kb_R	TTT CCA TAA CCC ATC TTT TGT TAA A		Blue 'n'
	mark03_15kb_F	GCC ACG TCT AAA AAC CTA GTA ATG A	BAC seq near 15 kb	Blue 'o'	Blue 4
	mark03_15kb_R	GTA GTA GTA GTG TGG TGC CGG TAG T		Blue 'p'
	mark03_20kb_F	AAT TTC TCG TAC AGC GTA ATG TAG C	BAC seq near 20 kb	Blue 'q'	Blue 5
	new_mark03_20kB_R	ATT TAT CGG CTT CTC CGT ACG TAT G		Blue 'r'
	unc-119_pro_F	GGT TCG CAA CAG GTT TCT TT	unc-119 presence	Green 'e'	Green 1
	unc-119_R	TTG TTG AGA GAG TTG AGG GAA C		Green 'f'
	kana-AscI_F	TTT GGC GCG CCC CGG AAT TGC CAG CTG GGG C	KanR presence	Green 'g'	Green 2
	kana_AscI_R	GGG GGC GCG CCT CAG AAG AAC TCG TCA AGA A		Green 'h'
	GFP_reverse	CCA TCT AAT TCA ACA AGA ATT GGG ACA AC	GFP presence	Not shown	Not shown
	GFPexon2_XbaI_F extra bps	GCT CTA GAC CAA CAC TTG TCA CTA CTT T		Not shown
	pCFJ104_check_F	ATC CGG CAG ATA TAC CAG ATT ATT T	mCherry presence (Ex array)	Not shown	Not shown
	pCFJ104_check_R	GCT CTT TCA TAT TGC TCA ACG ATA G		Not shown
	probe_1 forward	GGTTCGCAACAGGTTTCTTT	Southern probe #1	Not shown	Filled blue 1
	probe_1 reverse	ATCGGATATCAAGAGTTAGTTGAGCG		Not shown
	probe_2 forward	GACAGAGCATAAAGCGCGTG	Southern probe #2	Not shown	Filled blue 2
	probe_2 reverse	CTCGAGAGGGCGAAACGATA		Not shown
	probe_3 forward	GCTCAAACGAAGCGTCGAGG	Southern probe #3	Not shown	Filled blue 3
	probe_3 reverse	CTCGTCGTTTCGAACGTGAACA		Not shown
	S3K. Large BAC integration validation (attB_retrofitted_Sinv47D10)
	Primer name	Sequence (5'-3')	Purpose	Primer in Sup. Fig. S7 (diamonds)	PCR assay in Sup. Fig. S7
	NM3887	ACC GGA AAC CAA AGG ACG AGA G	Sense orientation, left	Orange 'a'	Orange 1
	unc-119_R	TTG TTG AGA GAG TTG AGG GAA C		Orange 'b'
	NM3888	ACG CCC AGG AGA ACA CGT TAG	Sense orientation, right	Orange 'c'	Orange 2
	mark03_sp6seq_F	ACT ACT TAT ATT TGC GAT AGC CAT G		Orange 'd'
	NM3887	ACC GGA AAC CAA AGG ACG AGA G	Antisense orientation, left	Orange 'a'	Not shown
	SP6_R	CTA CTT ATA TTT GCG ATA GCC ATG		Not shown (overlaps orange 'd')
	NM3888	ACG CCC AGG AGA ACA CGT TAG	Antisense orientation, right	Orange 'c'	Not shown
	unc-119_promoter_500_R	CAG AAA TGG GAA AAA GAG GAA G		Not shown (similar to orange 'b')
	phiC31_43.1_seq_F	GGT ATG GCA AAA AGT GCG ATG CAA GGA TAC T	phiC31 presence	Not shown	Not shown
	phiC31_43.1_seq_R	CCT ATT ATG GAA GTA ATG TTT CTA A		Not shown
	mark03_F_1	AAG CCC GTT TTC ATA ATA TAT GGT T	BAC seq near 1 kb	Blue 'i'	Blue 1
	mark03_R_1	TCT CTG AAT TTT CTT ATC GTG GAA C		Blue 'j'
	mark03_20kb_F	AAT TTC TCG TAC AGC GTA ATG TAG C	BAC seq near 20 kb	Blue 'k'	Blue 2
	mark03_20kb_R	ACT ACG GGA TTT GAT GTC AAA GTT A		Blue 'l'
	mark03_50kb_F	TAG AGA GAA AGG GGG AAG AGA ATA A	BAC seq near 50 kb	Blue 'm'	Blue 3
	mark03_50kb_R	CTG GAA GAT TTC ACT GAT TCA GAT T		Blue 'n'
	mark03_F_2	TTA TAT TTT CAT ACC GCA CTC CAT T	BAC seq near 65 kb	Blue 'o'	Blue 4
	mark03_R_2	GCA TTT GAG CAA CGA ATT ATA TAC C		Blue 'p'
	mark03_80kb_F	AAT GTT ACC AAC GCG TAA TAC TGT C	BAC seq near 80 kb	Blue 'q'	Blue 5
	mark03_80kb_R	TTT TAT CAT AAT CTG AAC GCC ATT T		Blue 'r'
	mark03_100kb_F	CGA GTT GTG TTA CTT TAT GCA TTT G	BAC seq near 100 kb	Blue 's'	Blue 6
	mark03_100kb_R	AAA AAG GAA GAA AGA CGG ACT AAG A		Blue 't'
	mark03_F_3	GGG CGT GTT AGA ATT GAT GG	BAC seq near 120 kb	Blue 'u'	Blue 7
	mark03_R_3	CCC CTA AGT GCG AAC GTA AA		Blue 'v'
	unc-119_pro_F	GGT TCG CAA CAG GTT TCT TT	unc-119 presence	Green 'e'	Green 1
	unc-119_R	TTG TTG AGA GAG TTG AGG GAA C		Green 'f'
	kana-AscI_F	TTT GGC GCG CCC CGG AAT TGC CAG CTG GGG C	KanR presence	Green 'g'	Green 2
	kana_AscI_R	GGG GGC GCG CCT CAG AAG AAC TCG TCA AGA A		Green 'h'
	GFP_reverse	CCA TCT AAT TCA ACA AGA ATT GGG ACA AC	GFP presence	Not shown	Not shown
	GFPexon2_XbaI_F extra bps	GCT CTA GAC CAA CAC TTG TCA CTA CTT T		Not shown
	pCFJ104_check_F	ATC CGG CAG ATA TAC CAG ATT ATT T	mCherry presence (Ex array)	Not shown	Not shown
	pCFJ104_check_R	GCT CTT TCA TAT TGC TCA ACG ATA G		Not shown
	probe_1 forward	GGTTCGCAACAGGTTTCTTT	Southern probe #1	Not shown	Filled blue 1
	probe_1 reverse	ATCGGATATCAAGAGTTAGTTGAGCG		Not shown
	probe_2 forward	GACAGAGCATAAAGCGCGTG	Southern probe #2	Not shown	Filled blue 2
	probe_2 reverse	CTCGAGAGGGCGAAACGATA		Not shown
	probe_3 forward	GCTCAAACGAAGCGTCGAGG	Southern probe #3	Not shown	Filled blue 3
	probe_3 reverse	CTCGTCGTTTCGAACGTGAACA		Not shown
	S3L. Sinv47D10 retrofitting and shortening primers
	Sequence name	Sequence (5'-3')	Description
	Cm_recombi_F	CCCGC CCTGC CACTC ATCGC AGTAC TGTTG TAATT CATTA AGCAT TCTGC TTATG CTTCC GGCTC GTAT	Used to PCR retrofitting cassette to obtain attB_retrofitted_Sinv47D10
	Cm_recombi_R	GCCGC TGGCG ATTCA GGTTC ATCAT GCCGT TTGTG ATGGC TTCCA TGTCG GGGAT AATAC CGCGC CACAT
	Del_mark03_20kB_amp_F	TACTA GGTGA ACGCC ACGTA GGCGA TCGTT TGGCT CGTAC ATACG TCTCG TTACC AATGC TTAAT CAGTG	Used to PCR ampR for shortening attB_retrofitted_Sinv47D10 into attB_retrofitted_Sinv47D10_short
	Del_mark03_amp_R	TAATC GCGAA TGTGA TGGTG CGGTG CAGTG CAGTG CAGCG AATCG TTAAA CGCGG AACCC CTATT TGTTT
	S3M. Other sequences
	Sequence name	Sequence (5'-3')	Description
	targeting sequence for Cbr-unc-119 #1	ggg aag gtc gcc gag ccg gg	Targeting sequence #1 for Cbr-unc-119 in sgRNA
	targeting sequence for Cbr-unc-119 #2	cct tgt tcg gtg ctt ggt gg	Targeting sequence #2 for Cbr-unc-119 in sgRNA
	targeting sequence for Cbr-unc-119 #3	att cct tgt tcg gtg ctt gg	Targeting sequence #3 for Cbr-unc-119 in sgRNA
